# Supplementary material for: Photocatalytic performance and mechanism insights of a S-scheme g-C3N4/Bi2MoO6 heterostructure in phenol degradation and hydrogen evolution reactions under visible light
Source: Royal Society of Chemistry journal article supplement (doi:10.1039/d0cp02199g), 2020-01-01
Supplement: d0cp02199g1.pdf [file d0cp02199g1.pdf]

SUPPLEMENTARY INFORMATION

---

Submitted to *Physical Chemistry Chemical Physics (PCCP)*

Electronic Supplementary Information for

**Photocatalytic performance and mechanism insights of S-scheme g-  
C<sub>3</sub>N<sub>4</sub>/Bi<sub>2</sub>MoO<sub>6</sub> heterostructure in phenol degradation and hydrogen  
evolution reaction under visible light**

Yanzhong Zhen<sup>a,†,\*</sup>, Chunming Yang<sup>a,†</sup>, Feng Fu<sup>a,\*</sup>, Huidong Shen<sup>a</sup>, Wenwen Xue<sup>a</sup>, Chunrong Gu<sup>a</sup>, Jinghao Feng<sup>a</sup>, Yuecheng Zhang<sup>a</sup>, Yucang Liang<sup>b,\*</sup>

<sup>a</sup> College of Chemistry & Chemical Engineering, Yan'an University, Shaanxi Key Laboratory of Chemical Reaction Engineering, Yan'an 716000, China

<sup>b</sup> Institut für Anorganische Chemie, Eberhard Karls Universität Tübingen, Auf der Morgenstelle 18, 72076 Tübingen, Germany

† These authors contributed equally to this work.

\* Corresponding authors at: College of Chemistry & Chemical Engineering, Yan'an University, Yan'an 716000, PR China

Institut für Anorganische Chemie, Eberhard Karls Universität Tübingen, Auf der Morgenstelle 18, 72076 Tübingen, Germany

E-mail addresses: [zyz943@163.com](mailto:zyz943@163.com) (Y. Zhen); [yadxfufeng@126.com](mailto:yadxfufeng@126.com) (F. Fu), [yucang.liang@uni-tuebingen.de](mailto:yucang.liang@uni-tuebingen.de) (Y. Liang)

### Content and caption

Fig.S1 XRD patterns of with as-prepared samples under different calcination temperature

Fig.S2 survey XPS curve of BMO-200 and 100% g-CN/BMO-200

Fig.S3. (a) UV–Vis DRS spectra of pristine BMO, BMO-200, X% g-CN/BMO-200 and pure g-CN, (b) UV–Vis DRS spectra 100% g-CN/BMO with different calcination temperature, (c) the  $E_g$  of pure g-CN and BMO-200.

Fig.S4. Cycling runs of 100% g-CN/BMO-200 (b) SEM images of 100% g-CN/BMO-200 before and after used

Table S1. Lifetimes and relative intensities of 100% g-CN/BMO-200, g-CN, BMO-200, Pristine BMO

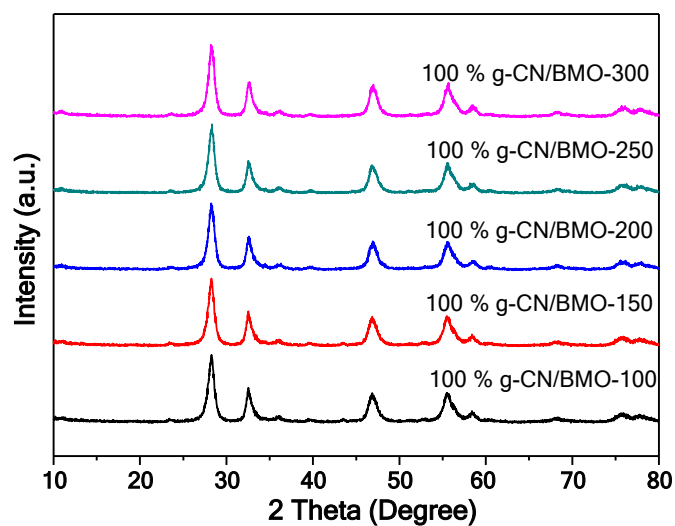

Fig.S1 XRD patterns of with as-prepared samples under different calcination temperature

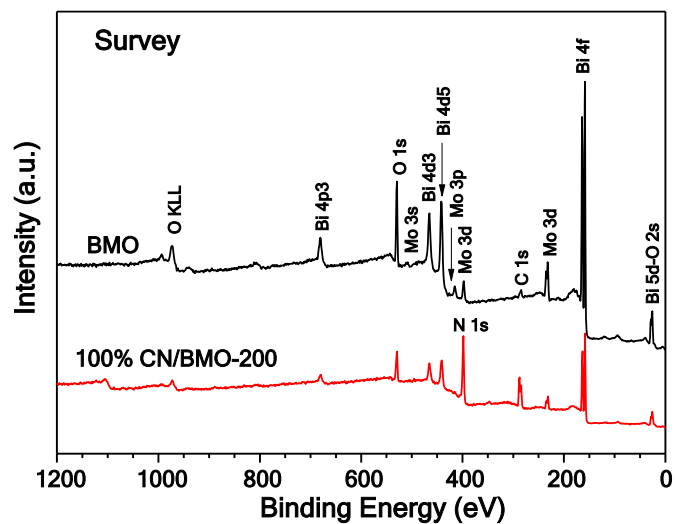

Fig.S2 survey XPS curve of BMO-200 and 100% g-CN/BMO-200

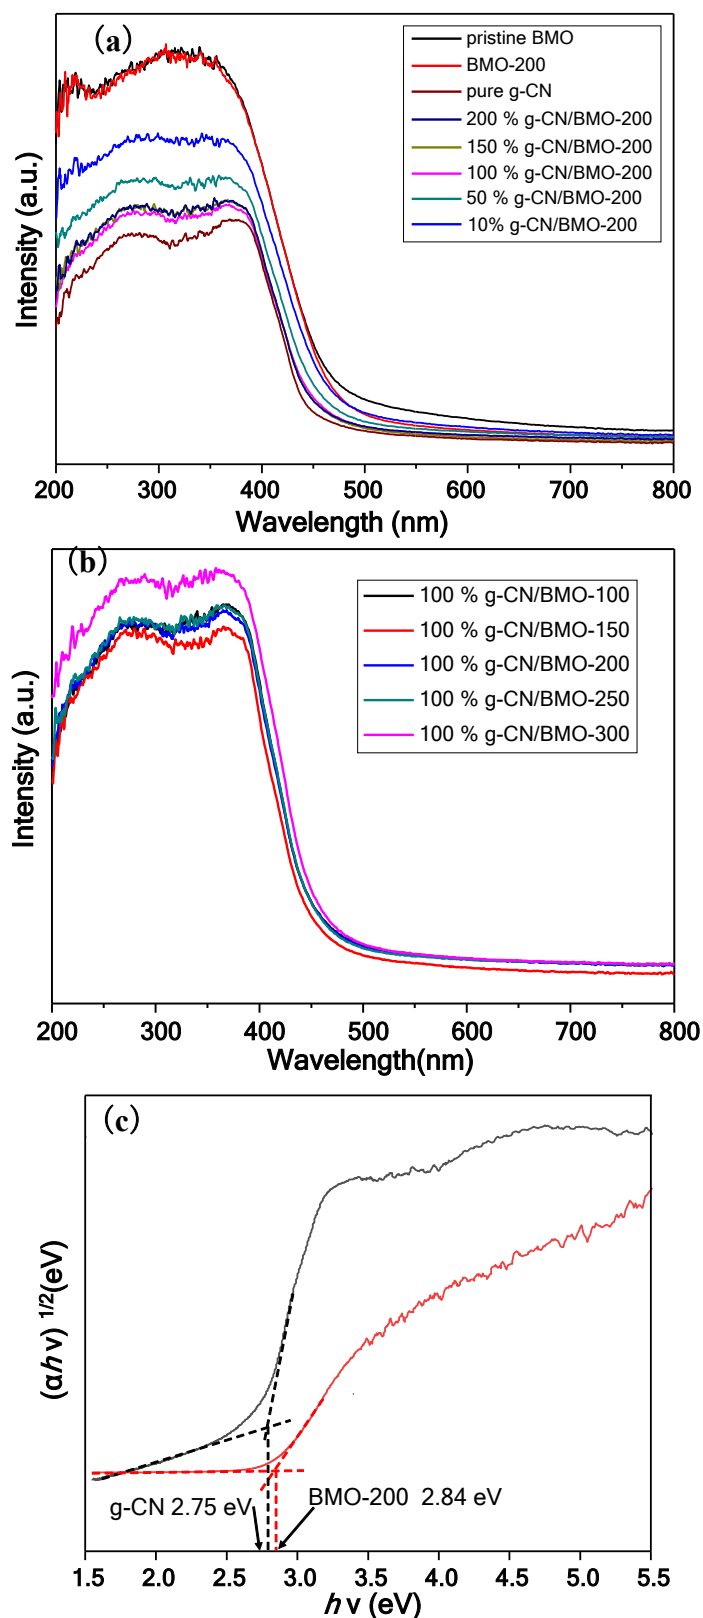

**Fig S3. (a) UV-Vis DRS spectra of pristine BMO, BMO-200, X% g-CN/BMO-200 and pure g-CN, (b) UV-Vis DRS spectra 100% g-CN/BMO with different calcination temperature, (c) the  $E_g$  of pure g-CN and BMO-200.**

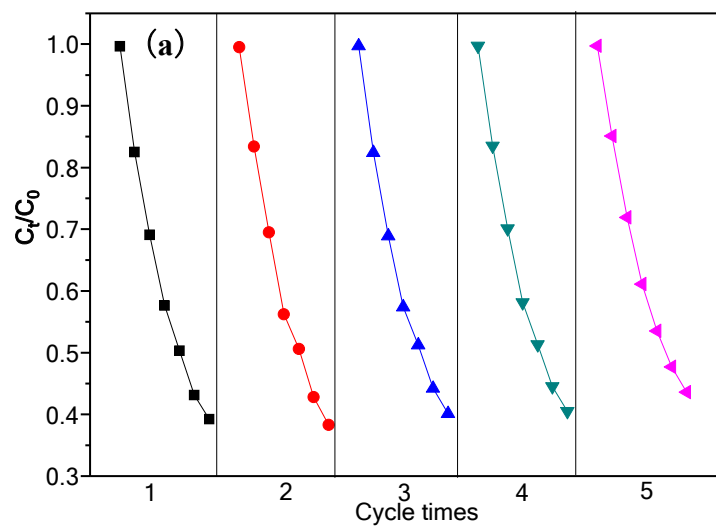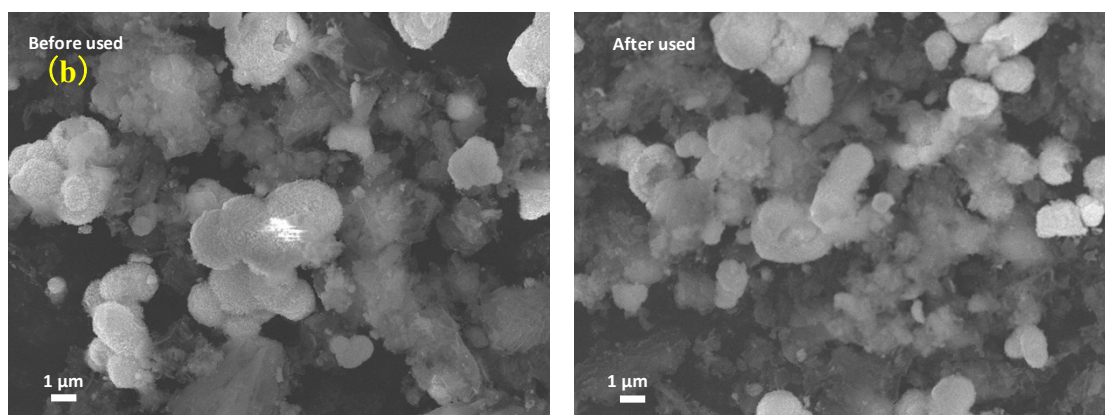

**Fig.S4. (a) Cycling runs of 100% g-CN/BMO-200 (b) SEM images of 100% g-CN/BMO-200 before and after used**

SUPPLEMENTARY INFORMATION

---

**Table S1. Lifetimes and relative intensities of 100% g-CN/BMO-200, g-CN, BMO-200, Pristine BMO**

---

| Sample            | $\tau_1$ (ns) | intensity | $\tau_2$ (ns) | intensity | $\tau_3$ (ns) | intensity |
|-------------------|---------------|-----------|---------------|-----------|---------------|-----------|
| 100% g-CN/BMO-200 | 1.79          | 51.21     | 6.54          | 48.79     |               |           |
| g-CN              | 1.56          | 50.48     | 6.08          | 0.17      |               |           |
| BMO-200           | 0.20          | 56.93     | 1.23          | 28.05     | 5.65          | 15.01     |
| Pristine BMO      | 0.08          | 57.87     | 0.63          | 37.19     | 3.38          | 4.94      |

---
